# Supplementary material
Source: Springer Nature journal article supplement (https://www.springermedizin.de/resource/supplementary/12885_2010_2555_MOESM2_ESM.pdf/9462518)

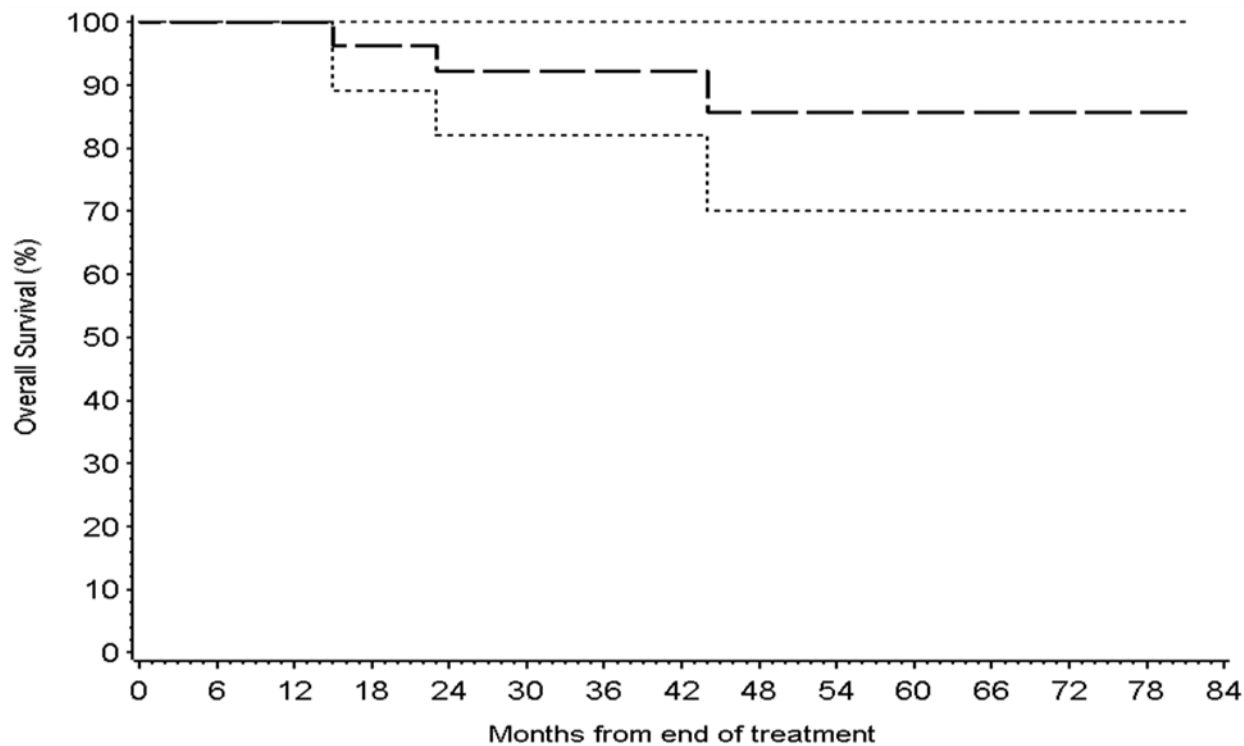

|          |     |     |            |            |              |              |              |
|----------|-----|-----|------------|------------|--------------|--------------|--------------|
| At risk  | 29  | 29  | 23         | 19         | 10           | 8            | 4            |
| OS (%)   | 100 | 100 | 92.3       | 92.3       | 85.7         | 85.7         | 85.7         |
| (95% CI) |     |     | (82.0-100) | (82.0-100) | (70.0-100.0) | (70.0-100.0) | (70.0-100.0) |

Supplement: MOESM2 [file 9462518]
